# Supplementary material for: Synthesis and aggregation-induced fluorescence emission properties of boron-containing derivatives that respond to viscous alcohols
Source: Royal Society of Chemistry journal article supplement (doi:10.1039/c4nj01512f), 2014-09-26
Supplement: c4nj01512f1.pdf [file c4nj01512f1.pdf]

*New Journal of Chemistry, Manuscript ID NJ-ART-09-2014-001512*

*Supporting Information(SI)*

Synthesis and Aggregation induced emission property of novel boron-containing derivatives with Sensors for Viscous Alcohol-Fluids

Weibo Yan\*, Guankui Long, Xuan Yang, Yongsheng Chen

State Key Laboratory for Functional Polymer Materials and Center for Nanoscale Science & Technology, Institute of Polymer Chemistry, College of Chemistry, Nankai University, Tianjin 300071, China. Telephone: 010-62754745, Fax: 010-62757156, Email: [yanweibo605@mail.nankai.edu.cn](mailto:yanweibo605@mail.nankai.edu.cn)

**Synthesis**

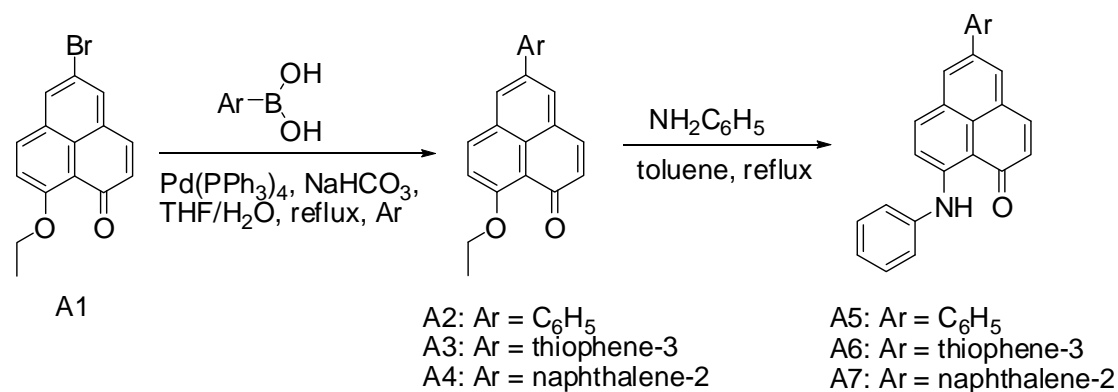

**Scheme S1.** The procedure for synthesis of compound **A3** and **A5-A7**.

The procedures for synthesis of compound **A1**, **A2** and **A4** were according to the literatures [1].

**Synthesis of compound A3**

Compound 5-Bromo-9-ethoxy-1-oxophenylene, **A1** (1.82 g, 6.0 mmol), 3-thiopheneboronic acid (0.92 g, 7.2 mmol), Pd(PPh<sub>3</sub>)<sub>4</sub> (0.21 g, 0.18 mmol), NaHCO<sub>3</sub> (1.51 g, 18 mmol) was added into degassed THF (50 mL)/water (30 mL) under argon. Then the mixture was refluxed at 90 °C for 48

hours. After the solution cooled down, the mixture was extracted by CH<sub>2</sub>Cl<sub>2</sub>, and then obtained organic phase was washed by saturated aqueous NH<sub>4</sub>Cl and dried by anhydrous Na<sub>2</sub>SO<sub>4</sub>. Then it was filtrated and concentrated to obtained crude product, which was purified (silica gel, petroleum ether/ethyl acetate 3:1, v/v) to give **A3** (1.38 g, 4.50 mmol) as a yellow powder, yield: 75.0 %. <sup>1</sup>H NMR (400 MHz, CDCl<sub>3</sub>): δ [ppm] = 8.19 (1H, d, *J* = 9.2 Hz), 8.13 (1H, d, *J* = 1.6 Hz), 8.03 (1H, d, *J* = 1.6 Hz), 7.73 (1H, d, *J* = 9.2 Hz), 7.61 (1H, q, *J* = 1.6 Hz), 7.53 (1H, q, *J* = 1.6 Hz), 7.50-7.47 (2H, m), 6.78 (1H, d, *J* = 9.6 Hz), 4.45 (2H, q, *J* = 7.2 Hz), 1.65 (3H, t, *J* = 7.2 Hz).

### Synthesis of compound A5

Compound **A2** (1.20 g, 4.0 mmol) and aniline (0.75 g, 8.0 mmol) was added in toluene (30 mL) and stirred and refluxed at 120 °C for 12 hours. Then the mixture was cooled down and excess solvent was removed to obtain crude product, which was purified (silica gel, petroleum ether/ethyl acetate 10:1, v/v) to give **A5** (1.26 g, 3.64 mmol) as a red powder, yield: 91.0 %. <sup>1</sup>H NMR (400 MHz, CDCl<sub>3</sub>): δ [ppm] = 13.75 (1H, s), 8.11 (2H, d, *J* = 3.6 Hz), 7.97 (1H, d, *J* = 7.2 Hz), 7.94 (1H, d, *J* = 7.2 Hz), 7.73 (2H, d, *J* = 7.6 Hz), 7.54-7.45 (5H, m), 7.42-7.38 (3H, m), 7.30 (1H, t, *J* = 9.2 Hz), 7.05 (1H, d, *J* = 7.2 Hz). MS (ESI): calcd. for M = [C<sub>25</sub>H<sub>17</sub>ON]: 347.4; found: [M+1]<sup>+</sup>: 348.1.

### Synthesis of compound A6

The method to synthesise compound **A6** is similar with that of **A5**. Yield: 92.5 %.

<sup>1</sup>H NMR (300 MHz, CDCl<sub>3</sub>): δ [ppm] = 13.02 (1H, s), 8.25 (2H, d, *J* = 14.4 Hz), 8.15 (1H, d, *J* = 9.3 Hz), 8.07 (1H, d, *J* = 9.6 Hz), 7.75 (1H, d, *J* = 9.3 Hz), 7.40-7.63 (1H, m), 7.56-7.49 (4H, m), 7.46-7.41 (4H, m). MS (ESI): calcd. for M = [C<sub>23</sub>H<sub>15</sub>SON]: 353.4; found: [M+1]<sup>+</sup>: 354.1.

### Synthesis of compound A7

The method to synthesise compound **A6** is similar with that of **A5**. Yield: 85.8 %. <sup>1</sup>H NMR (400 MHz, CDCl<sub>3</sub>): δ [ppm] = 13.75 (1H, s), 8.21 (2H, d, *J* = 3.6 Hz), 8.15 (1H, m), 8.00-7.84 (6H, m), 7.54-7.39 (7H, m), 7.29 (1H, t, *J* = 9.6 Hz), 7.06 (1H, d, *J* = 12.4 Hz). MS (ESI): calcd for: M = [C<sub>29</sub>H<sub>19</sub>ON]: 397.5; found: [M+1]<sup>+</sup>: 398.2.

## Calculation analysis

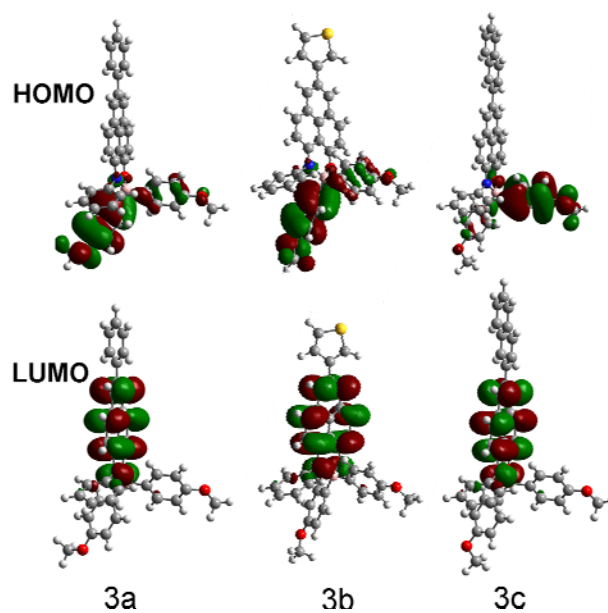

**Figure S1.** A) Optimized molecular structures, and molecular orbital amplitude plots of HOMOs and LUMOs of compounds **3(a,b,c)** calculated using B3LYP/6-31G\*.

## Spectroscopic properties

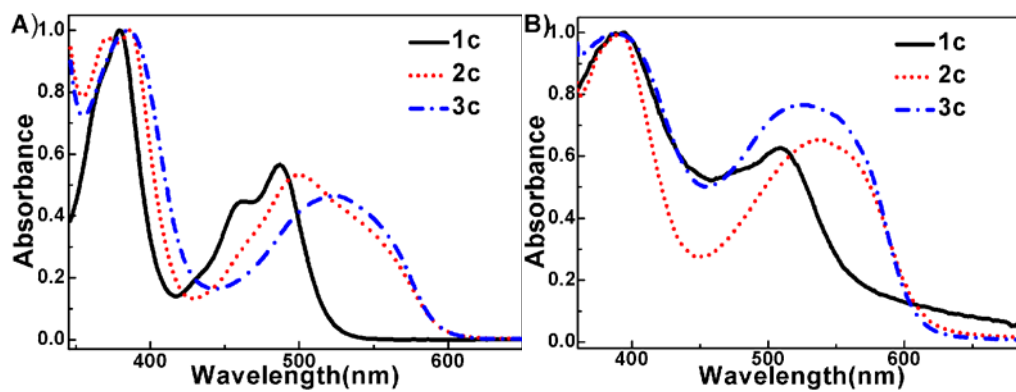

**Figure S2.** A) Absorption spectra of **1c**, **2c** and **3c** in THF solutions; B) Absorption spectra of **1c**, **2c** and **3c** in solid film.

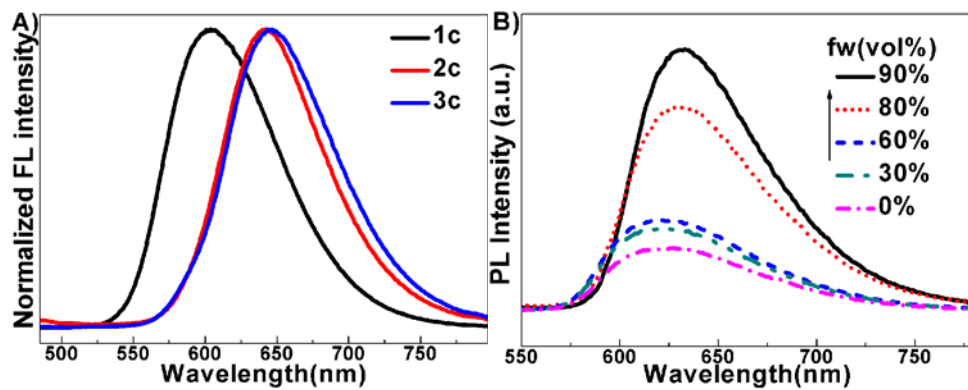

**Figure S3.** A) PL spectra of **1c-3c** in solid film, excited at maximum excitation wavelength, 395 nm. B) PL spectra of **3b** in THF/water mixtures with different water fraction (fw), excited at 468 nm.

### Electrochemical analysis

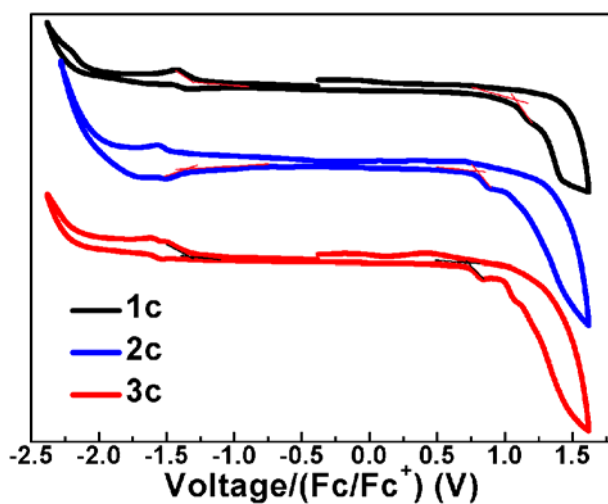

**Figure S4.** Cyclic voltammograms of **1c-3c** in a dichloromethane solution of  $0.1 \text{ mol L}^{-1} \text{ Bu}_4\text{NPF}_6$  with a scan rate of  $0.1 \text{ Vs}^{-1}$  and  $\text{Fc}/\text{Fc}^+$  as internal reference.

### Optical and electrochemistry data

**Table S1.** Optical and electrochemistry data summary of compound **1a-3c**.

| Compound | $\lambda_{\text{abs}}^{\text{max}}$ (nm)<br>Solution <sup>a</sup> | $\lambda_{\text{abs}}^{\text{max}}$ (nm)<br>Film <sup>b</sup> | $\lambda_{\text{FL}}^{\text{max}}$ (nm)<br>Film <sup>c</sup> | HOMO <sup>d</sup><br>(eV) | LUMO <sup>d</sup><br>(eV) | $E_{g_{cv}}^d$<br>(eV) | $E_{g_{opt}}^d$<br>(eV) | $\Phi_F$ (%)<br>Film |
|----------|-------------------------------------------------------------------|---------------------------------------------------------------|--------------------------------------------------------------|---------------------------|---------------------------|------------------------|-------------------------|----------------------|
| 1a       | 377,483                                                           | 387,500                                                       | 579                                                          | -6.05                     | -3.52                     | 2.53                   | 2.42                    | 38                   |
| 1b       | 380,491                                                           | 379,483                                                       | 593                                                          | -5.86                     | -3.49                     | 2.37                   | 2.38                    | 34                   |
| 1c       | 379,487                                                           | 390,509                                                       | 603                                                          | -5.89                     | -3.50                     | 2.39                   | 2.39                    | 17                   |
| 2a       | 386,520                                                           | 394,538                                                       | 645                                                          | -5.26                     | -3.27                     | 1.99                   | 2.11                    | 74                   |
| 2b       | 387,503                                                           | 399,543                                                       | 635                                                          | -5.55                     | -3.51                     | 2.04                   | 2.08                    | 69                   |
| 2c       | 386,500                                                           | 391,537                                                       | 643                                                          | -5.52                     | -3.50                     | 2.20                   | 2.09                    | 73                   |
| 3a       | 383,506                                                           | 388,525                                                       | 644                                                          | -5.35                     | -3.34                     | 2.01                   | 2.10                    | 81                   |
| 3b       | 382,502                                                           | 390,533                                                       | 636                                                          | -5.52                     | -3.50                     | 2.02                   | 2.07                    | 70                   |
| 3c       | 385,523                                                           | 389,525                                                       | 646                                                          | -5.54                     | -3.47                     | 2.07                   | 2.09                    | 67                   |

<sup>a</sup> In THF solution (10  $\mu\text{m}$ ). <sup>b</sup> Film drop-casted on quartz plate. <sup>c</sup> Film drop-casted on quartz plate.

<sup>d</sup> HOMO (Fc) = -e ( $E^l$ , ox) + (-4.8) eV, LUMO (Fc) = -e ( $E^l$ , re) + (-4.8) eV,  $E_{g_{cv}} = \text{LUMO} - \text{HOMO}$ ,  $E_{g_{opt}} = 1240 / \lambda_g$ .

## Reference

- 1 W. Yan, C. Hong, G. Long, Y. Yang, Z. Liu, Z. Bian, Y. Chen, C. Huang, *Dyes Pigments* 106 (2014) 197-204.
